# Supplementary material
Source: PubMed Central journal article supplement (PMC1317675)
Supplement: bj3920163add.pdf [file bj3920163add.pdf]

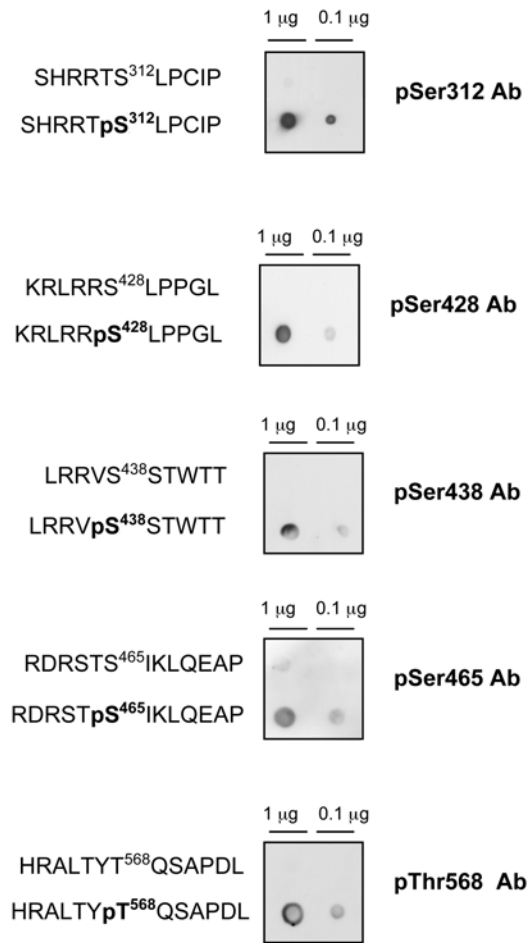

**Supplementary Figure 1 Characterization of phosphospecific antibodies that recognize the pSer<sup>312</sup>, pSer<sup>428</sup>, pSer<sup>438</sup>, pSer<sup>465</sup> and pThr<sup>568</sup> sites on PDE3A**

These panels show dot blots under the conditions required for each antibody to recognize its own phosphopeptide immunogen specifically, following earlier trials to establish the specificity of all of the antibodies against all of the peptides. The indicated amounts of phosphopeptides and unphosphorylated peptides were spotted on to nitrocellulose membranes (Schleicher and Schuell) and were then immunoblotted using the indicated antibodies under the following conditions: anti-pSer<sup>312</sup> antibody (pSer312 Ab) was used in the absence of any competitor peptides; anti-pSer<sup>428</sup> antibody (pSer428 Ab) was incubated in the presence of 20 µg/ml KRLRRSLPPGL; anti-pSer<sup>438</sup> antibody (pSer438 Ab) was incubated in the presence of 20 µg/ml LRRVSSTWTT; anti-pSer<sup>465</sup> antibody (pSer465 Ab) was incubated in the presence of 10 µg/ml each of RDRSTS<sup>465</sup>IKLQEAP, KRLRRpSLPPGL and KRLRRSLPPGL; and anti-pThr<sup>568</sup> antibody (pThr568 Ab) was incubated in the presence of 20 µg/ml HRALTYTQSAPDL. The prefix p denotes a phosphorylated residue.
